# Supplementary material
Source: bioRxiv or medRxiv preprint supplement (https://medrxiv.org/highwire/filestream/73507/field_highwire_adjunct_files/0/2020.03.09.20033100-1.pdf)

**Additional file 1:** Collected data per commune and per individual across the district

| Commune              | Distance (km) | Land cover (%) |        |      |            |         |                  | Slope (%) |         |          | Rainfall (mm) |         |         |
|----------------------|---------------|----------------|--------|------|------------|---------|------------------|-----------|---------|----------|---------------|---------|---------|
|                      |               | Water bodies   | Forest | Mixt | Rice field | Savanna | Residential area | [0,30]    | (30,60] | (60,100] | [0,10]        | (10,25] | (25,50] |
| Ambiabe              | 112           | 0.18           | 3.17   | 0.04 | 2.17       | 89.59   | 4.85             | 96.50     | 2.50    | 1        | 100           |         |         |
| Ambohimanga Du Sud   | 50            |                |        | 1.02 | 2.21       | 96.54   | 0.23             | 93.21     | 4.98    | 1.81     | 81.61         | 18.39   |         |
| Ampasinambo          | 0.56          |                |        |      | 11.16      | 55.81   | 33.04            | 80.00     | 17.78   | 2.22     | 100           |         |         |
| Antaretra            | 116           | 0.28           | 0.24   | 0.04 | 7.7        | 87.54   | 4.20             | 90.67     | 7.95    | 1.38     | 29.25         | 70.75   |         |
| Antsindra            | 1.3           |                |        |      |            | 100     |                  | 100       |         |          | 100           |         |         |
| Fasintsara           | 0.9           |                |        |      |            |         | 100              | 87.50     | 12.50   |          | 100           |         |         |
| Ifanadiana           | 157           | 0.67           | 2.96   | 0.13 | 1.77       | 81.31   | 13.17            | 95.35     | 3.62    | 1.03     | 100           |         |         |
| Kelilalina           | 276           | 0.14           | 1.07   | 0.52 | 8.68       | 84.35   | 5.25             | 95.19     | 4.28    | 0.54     | 83.35         | 10.18   | 6.47    |
| Ranomafana           | 149           | 0.04           | 16.43  | 1.87 | 5.61       | 70.79   | 5.26             | 94.52     | 4.55    | 0.92     | 96.9          | 3.10    |         |
| Tsaratana            | 8             |                |        | 3.92 |            | 96.08   |                  | 96.00     | 4       |          | 100           |         |         |
| <b>Individual</b>    |               |                |        |      |            |         |                  |           |         |          |               |         |         |
| Local population     | 539           | 0.18           | 4.84   | 0.05 | 4.99       | 81.08   | 8.87             | 94.80     | 4.25    | 0.95     | 87.26         | 12.74   |         |
| PIVOT research team  | 103           | 0.20           | 0.71   | 0.07 | 8.66       | 86.29   | 4.07             | 94.15     | 5.30    | 0.55     | 60.6          | 25.02   | 14.37   |
| Community team staff | 229           | 0.37           | 3.99   | 2.18 | 5.17       | 87.44   | 0.85             | 92.38     | 5.89    | 1.74     | 96.34         | 3.66    |         |

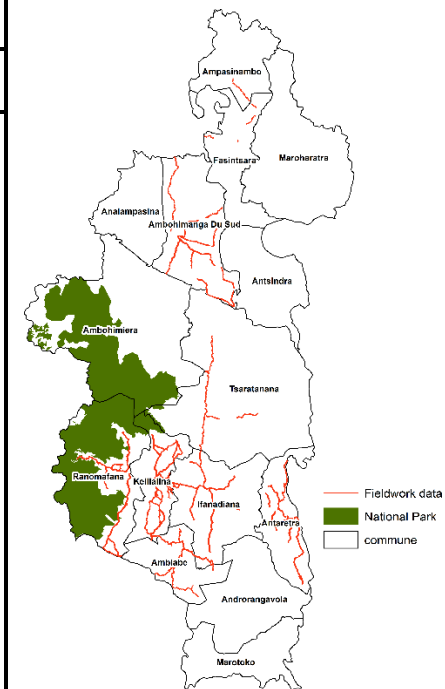

Supplement: Supplementary file [file 2020.03.09.20033100-1.pdf]
